# Supplementary material for: Analyzing Relationships of Conductivity and Alkalinity Using Historical Datasets from Streams in Northern Alberta, Canada
Source: MDPI journal article supplement (doi:10.3390/w14162503), 2022-08-14
Supplement: s1 [file s1]

Archive with 2 entries (2 files):
- Final_AppendixA.pdf
- Final_Supp_Info.pdf
